# Supplementary material for: Setting the Optimal Laser Power for Sustainable Powder Bed Fusion Processing of Elastomeric Polyesters: A Combined Experimental and Theoretical Study
Source: MDPI journal article supplement (doi:10.3390/ma15010385), 2022-01-05
Supplement: s1 [file s1]

# Supporting Information for “Setting the Optimal Laser Power for Sustainable Powder Bed Fusion Processing of Elastomeric Polyesters: A Combined Experimental and Theoretical Study”

Ruben Vande Ryse <sup>1</sup>, Mariya Edeleva <sup>2</sup>, Ortwin Van Stichel <sup>1</sup>, Dagmar R. D’hooge <sup>2,3</sup>,  
Frederik Pille <sup>4</sup>, Rudinei Fiorio <sup>1</sup>, Patrick De Baets <sup>5</sup> and Ludwig Cardon <sup>1,\*</sup>

<sup>1</sup> Centre for Polymer and Material Technologies (CPMT), Department of Materials, Textiles and Chemical Engineering, Ghent University, Technologiepark 130, 9052 Zwijnaarde, Belgium; Ruben.VandeRyse@ugent.be (R.V.R.); cpmt@ugent.be (O.V.S.); rudinei.fiorio@UGent.be (R.F.)

<sup>2</sup> Laboratory for Chemical Technology (LCT), Department of Materials, Textiles and Chemical Engineering, Ghent University, Technologiepark 125, 9052 Zwijnaarde, Belgium; mariya.edelewa@ugent.be (M.E.); dagmar.dhooge@ugent.be (D.R.D.)

<sup>3</sup> Centre for Textiles Science and Engineering (CTSE), Department of Materials, Textiles and Chemical Engineering, Ghent University, Technologiepark 70A, 9052 Zwijnaarde, Belgium

<sup>4</sup> Department of Surgery and Anaesthesiology, Faculty of Veterinary Medicine, Ghent University, Salisburylaan 133, 9820 Merelbeke, Belgium; frederik.pille@ugent.be

<sup>5</sup> Soete Laboratory, Department of Electromechanical, Systems and Metal Engineering, Ghent University, Technologiepark 46, 9052 Zwijnaarde, Belgium; Patrick.DeBaets@UGent.be

\* Correspondence: ludwig.cardon@ugent.be

Considering the values of the set laser power ( $P$ ), the hemispherical reflectance of SLS powders ( $R_p$ ) (Equation (12) in the main text), the transmittance of light through the particles ( $T_p$ ) (Equation (15) in the main text), the diameter of the powder particle  $D$ , and the diameter of the laser beam  $D_b$ , one can evaluate the power absorbed by a solid particle ( $P_{p_{solid}}$ , W) by:

$$P_{p_{solid}} = \frac{P \cdot (1 - R_p) \cdot (1 - T_p) \cdot \pi(0.5 \times D)^2}{\pi(0.5 \times D_b)^2} \quad (S1)$$

in which the numerator is the power absorbed by a particle with diameter  $D$  ( $\text{W} \cdot \text{m}^2$ ), and the denominator is the total area of the laser beam ( $\text{m}^2$ ).

Similarly, the power absorbed by a molten particle ( $P_{p_{melt}}$ , W) with an initial diameter  $D$  is evaluated replacing  $R_p$  in the previous equation by the reflectance of the incident light on the material ( $R$ ) (Equation (11) in the main text):

$$P_{p_{melt}} = \frac{P \times (1 - R) \times (1 - T_p) \times \pi(0.5 \times D)^2}{\pi(0.5 \times D_b)^2} \quad (S2)$$

Taking into account the energy for melting of the material,  $[C_{p_{solid}} \times (T_m - T_b) + \Delta H_m]$ , the volume of a roughly spherical powder particle with diameter  $D$ ,  $\left[\frac{4}{3}\pi \times (0.5 \times D)^3\right]$ , and the specific density of the polymer ( $\rho$ ), the exposition time to the laser required for melting the solid particle ( $t_{mp_{solid}}$ , s) is:

$$t_{mp_{solid}} = \frac{[C_{p_{solid}} \cdot (T_m - T_b) + \Delta H_m] \cdot \left\{ \rho \cdot \left[ \frac{4}{3} \pi \cdot (0.5 \times D)^3 \right] \right\}}{P_{p_{solid}}} \quad (S3)$$

in which the numerator is the energy for melting a particle with diameter  $D$  (J) and the denominator is the power absorbed by the solid particle (W).

If the exposition time of the laser ( $t_{ex}$ ) (Equation (10) in the main text) is longer than  $t_{mp_{solid}}$ , the exposition time of the molten particle to the laser ( $t_{p_{melt}}$ , s) is:

$$t_{p_{melt}} = t_{ex} - t_{mp_{solid}} \quad (S4)$$

From  $t_{p_{melt}}$ ,  $P_{p_{melt}}$  and  $T_m$  (°C), the maximal temperature reached in the particle ( $T_{max}$ , K) becomes:

$$T_{max} = T_m + \frac{P_{p_{melt}} \times t_{p_{melt}}}{\rho \times \frac{4}{3} \pi \times (0.5 \times D)^3 \times C_{p_{melt}}} \quad (S5)$$

in which the nominator is the energy absorbed by a molten particle (J) during the time  $t_{p_{melt}}$  and the denominator is the energy required to increase the temperature of the particle with 1 °C (J·°C<sup>-1</sup>).

Considering the volume of a powder particle ( $V_p$ ), the projected area of the laser beam ( $Ar_b$ ), and the projected area of the powder particle ( $Ar_p$ ), Equation (S5) can be rearranged as Equation (18) in the main text:

$$T_{max} = T_m + \left[ \frac{P \cdot (1 - R) \cdot (1 - T_p) \cdot Ar_p}{Ar_b \cdot \rho \cdot V_p \cdot C_{p_{melt}}} \right] \cdot \left\{ t_{ex} - \frac{(V_p \cdot \rho \cdot Ar_b) \cdot [C_{p_{solid}} \cdot (T_m - T_b) + \Delta H_m]}{P \cdot (1 - R_p) \cdot (1 - T_p) \cdot Ar_p} \right\} \quad (S6)$$

From the degradation temperature ( $T_{deg}$ , °C) one can calculate the laser power for degradation ( $P_{D_{ref+abs}}$ , W), i.e., the the laser power required to reach  $T_{deg}$ :

$$P_{D_{ref+abs}} = \left\{ \frac{V_p \cdot \rho \cdot [C_{p_{solid}} \cdot (T_m - T_b) + \Delta H_m]}{(1 - R_p) \cdot (1 - T_p)} + \frac{V_p \cdot \rho \cdot [C_{p_{melt}} \cdot (T_{deg} - T_m)]}{(1 - R) \cdot (1 - T_p)} \right\} \cdot \frac{Ar_b}{Ar_p} \cdot \frac{1}{t_{ex}} \quad (S7)$$

in which, inside the brackets, the left side of the equation is the energy necessary to melt one particle with diameter  $D$  considering the reflected and transmitted light (J), and the right side of the equation is the energy necessary to heat the particle up to  $T_{deg}$  considering the reflected and transmitted light (J).

Equation (S7) can be rearranged as Equation (17) in the main text:

$$P_{D_{ref+abs}} = \frac{V_p \cdot \rho \cdot Ar_b \cdot [C_{p_{solid}} \cdot (T_m - T_b) + \Delta H_m]}{t_{ex} \cdot (1 - R_p) \cdot (1 - T_p) \cdot Ar_p} + \frac{V_p \cdot \rho \cdot Ar_b \cdot C_{p_{melt}} \cdot (T_{deg} - T_m)}{t_{ex} \cdot (1 - R) \cdot (1 - T_p) \cdot Ar_p} \quad (S8)$$
